# Supplementary material
Source: MDPI journal article supplement (https://www.mdpi.com/2227-9040/9/6/134)
Supplement: s1 [file s1]

## Supplementary materials

### Terbium(III) as the fluorescent microheterogeneous probe for molecular detection of ascorbic acid

Natalia Selivanova and Yuriy Galyametdinov

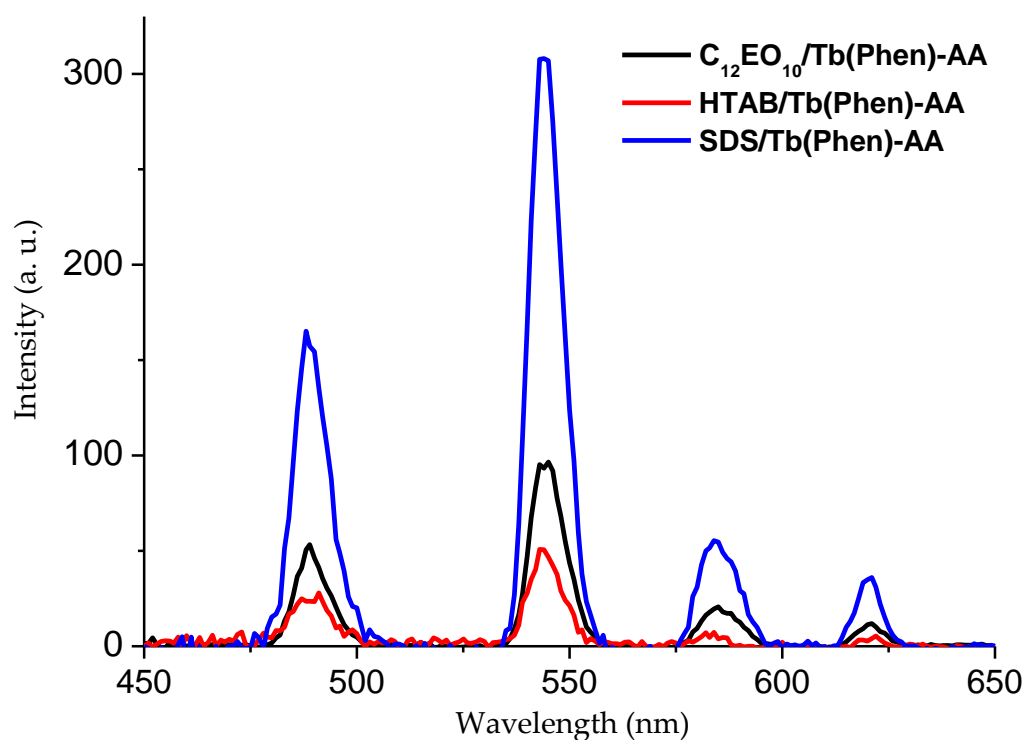

**Figure S1.** Fluorescence spectra of the Tb(Phen)- AA in microheterogeneous media: Tb(Phen)-AA- $C_{12}EO_{10}$ ; Tb(Phen)- AA -HTAB; Tb(Phen)- AA-SDS

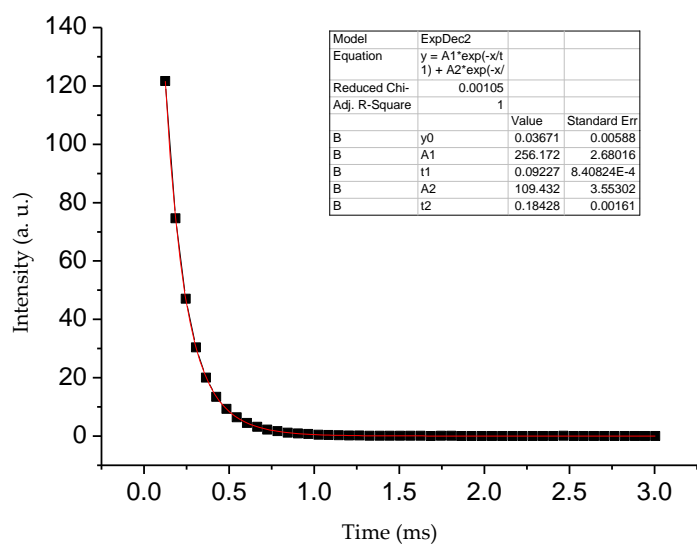

**Figure S2.** Fluorescence decay curve of Tb(Phen) in aqueous solution.
